# Supplementary material
Source: PubMed Central journal article supplement (PMC10501469)
Supplement: dead069_supplementary_figure_s1.pdf [file dead069_supplementary_figure_s1.pdf]

human reproduction SUPPLEMENTARY DATA

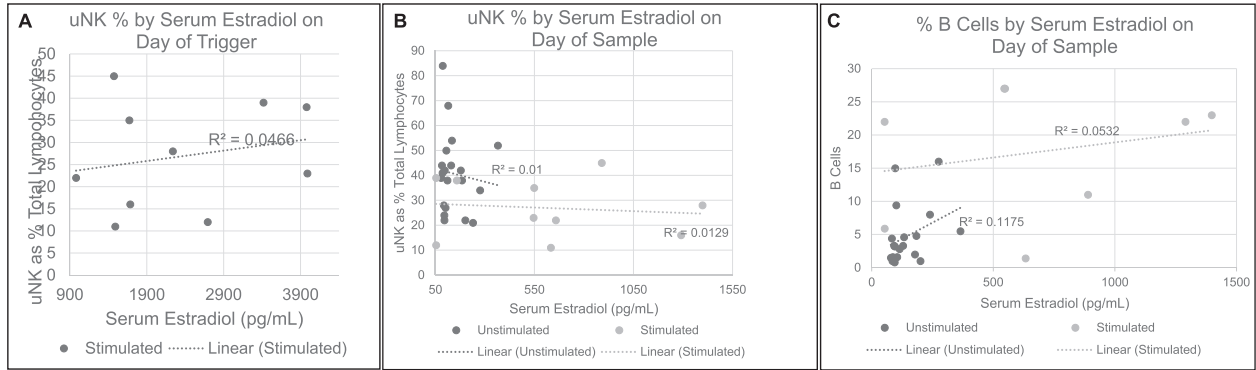

**Supplementary Figure S1. Correlation of uterine natural killer (uNK) cell abundance with hormone levels.** Serum estradiol level did not correlate with (A) uNK abundance on day of trigger, in (B) stimulated population uNK cell abundance on day of sampling, or (C) B-cell abundance on day of sampling in either population.
