# Supplementary material
Source: PubMed Central journal article supplement (PMC10501469)
Supplement: dead069_supplementary_table_si.pdf [file dead069_supplementary_table_si.pdf]

**Supplementary Table S1** Flow cytometry antibodies.

| Antigen  | Fluorophore | Clone    | Company | Dilution |
|----------|-------------|----------|---------|----------|
| CD3      | BV785       | UCHL1    | BL      | 1:100    |
|          | APC-Fire750 | SK7      | BD      | 1:100    |
| CD4      | BUV395      | SK3      | BD      | 1:100    |
| CD8      | PE-Cy5      | HIT8a    | BL      | 1:100    |
| CD11c    | PE-Cy7      | B-ly6    | BD      | 1:100    |
| CD14     | V450        | MomegaP9 | BD      | 1:100    |
| CD16     | AF700       | 3G8      | BL      | 1:100    |
| CD18     | PE-Cy7      | TS1/18   | BL      | 1:100    |
| CD19     | BV605       | HIB19    | BL      | 1:100    |
|          | APC-Fire750 | SJ25C1   | BD      | 1:100    |
| CD39     | BV510       | AI       | BL      | 1:100    |
| CD45     | PerCP-Cy5.5 | HI30     | BL      | 1:100    |
| CD56     | BV650       | 5.1H11   | BL      | 1:100    |
|          | PE          | B159     | BD      | 1:100    |
| CD64     | APC-Fire750 | 10.1     | BL      | 1:100    |
| CD103    | PE-CF594    | Ber-ACT8 | BL      | 1:100    |
| CD158a   | FITC        | HP-MA4   | BL      | 1:100    |
| CD158b   | PE          | DX27     | BL      | 1:100    |
| HLA-DR   | V500        | G46-6    | BD      | 1:100    |
| Perforin | AF647       | deltaG9  | BD      | 1:100    |

Antibodies used for flow cytometry and cell sorting. To stain intracellularly with anti-Perforin, the BD Biosciences Cytofix/Cytoperm kit was used following manufacturer instructions exactly. BD, BD Biosciences; BL, Biolegend.
