# Supplementary material
Source: PubMed Central journal article supplement (PMC10501469)
Supplement: dead069_supplementary_table_sii.pdf [file dead069_supplementary_table_sii.pdf]

**Supplementary Table SII Genes differentially expressed in pre-pregnancy uNK cells due to hormonal stimulation.**

| Gene name         | Gene description                                                 | Chromosome # | Fold change | P-value  |
|-------------------|------------------------------------------------------------------|--------------|-------------|----------|
| <i>CHIT1</i>      | Chitinase 1                                                      | 1            | 68.167      | 0.000    |
| <i>LDHC</i>       | Lactate dehydrogenase C                                          | 11           | 68.058      | 0.002    |
| <i>GRM7</i>       | Glutamate metabotropic receptor 7                                | 3            | 45.954      | 0.0003   |
| <i>KCNK17</i>     | Potassium two pore domain channel subfamily K member 17          | 6            | 39.714      | 0.000001 |
| <i>AC006518.7</i> |                                                                  | 12           | 31.719      | 0.0001   |
| <i>CPB1</i>       | Carboxypeptidase B1                                              | 3            | 30.211      | 0.006    |
| <i>ANKRD20A2</i>  | Ankyrin repeat domain 20 family member A2                        | 9            | 24.188      | 0.008    |
| <i>ARHGEF33</i>   | Rho guanine nucleotide exchange factor 33                        | 2            | 23.622      | 0.002    |
| <i>SLC6A13</i>    | Solute carrier family 6 member 13                                | 12           | 22.754      | 0.003    |
| <i>SNAP91</i>     | Synaptosome associated protein 91                                | 6            | 22.681      | 0.001    |
| <i>UPB1</i>       | Beta-ureidopropionase 1                                          | 22           | 18.595      | 0.002    |
| <i>IGF2BP1</i>    | Insulin like growth factor 2 mRNA binding protein 1              | 17           | 16.671      | 0.007    |
| <i>TERB1</i>      | Telomere repeat binding bouquet formation protein 1              | 16           | 15.859      | 0.008    |
| <i>USP17L15</i>   | Ubiquitin specific peptidase 17 like family member 15            | 4            | 15.168      | 0.0005   |
| <i>ITGA2B</i>     | Integrin subunit alpha 2b                                        | 17           | 14.579      | 0.007    |
| <i>ARC</i>        | Activity regulated cytoskeleton associated protein               | 8            | 13.681      | 0.002    |
| <i>KCNK3</i>      | Potassium two pore domain channel subfamily K member 3           | 2            | 13.672      | 0.003    |
| <i>PLA2G2A</i>    | Phospholipase A2 group IIA                                       | 1            | 12.866      | 0.00004  |
| <i>HECW1</i>      | HECT, C2, and WW domain containing E3 ubiquitin protein ligase 1 | 7            | 12.814      | 0.004    |
| <i>NR2E3</i>      | Nuclear receptor subfamily 2 group E member 3                    | 15           | 12.549      | 0.002    |
| <i>JPH1</i>       | Junctophilin 1                                                   | 8            | 11.863      | 0.008    |
| <i>MAP7D2</i>     | MAP7 domain containing 2                                         | X            | 11.303      | 0.003    |
| <i>SRPX2</i>      | Sushi repeat containing protein X-linked 2                       | X            | 9.927       | 0.008    |
| <i>SCHIP1</i>     | Schwannomin interacting protein 1                                | 3            | 9.763       | 0.004    |
| <i>ZSCAN10</i>    | Zinc finger and SCAN domain containing 10                        | 16           | 9.056       | 0.008    |
| <i>IGSF10</i>     | Immunoglobulin superfamily member 10                             | 3            | 8.794       | 0.000    |
| <i>NGFR</i>       | Nerve growth factor receptor                                     | 17           | 8.209       | 0.002    |
| <i>AC091167.7</i> | Novel protein                                                    | 15           | 7.569       | 0.000    |
| <i>AC005837.2</i> | Novel protein                                                    | 17           | 7.319       | 0.010    |
| <i>THBS2</i>      | Thrombospondin 2                                                 | 6            | 7.165       | 0.000    |
| <i>MYOZ3</i>      | Myozenin 3                                                       | 5            | 7.044       | 0.008    |
| <i>MYOCD</i>      | Myocardin                                                        | 17           | 6.920       | 0.001    |
| <i>CXCL12</i>     | C-X-C motif chemokine ligand 12                                  | 10           | 6.866       | 0.007    |
| <i>SOBP</i>       | Sine oculis-binding protein homolog                              | 6            | 6.130       | 0.001    |
| <i>FAM227A</i>    | Family with sequence similarity 227 member A                     | 22           | 5.863       | 0.00005  |
| <i>CHRNA7</i>     | Cholinergic receptor nicotinic alpha 7 subunit                   | 15           | 5.594       | 0.001    |
| <i>CCDC40</i>     | Coiled-coil domain containing 40                                 | 17           | 5.507       | 0.008    |
| <i>PRSS21</i>     | Serine protease 21                                               | 16           | 5.494       | 0.000    |
| <i>CDH13</i>      | Cadherin 13                                                      | 16           | 5.154       | 0.001    |
| <i>ANKRD20A1</i>  | Ankyrin repeat domain 20 family member A1                        | 9            | 5.079       | 0.007    |
| <i>TLE2</i>       | TLE family member 2, transcriptional corepressor                 | 19           | 4.965       | 0.006    |
| <i>PAK3</i>       | p21 (RAC1)-activated kinase 3                                    | X            | 4.872       | 0.009    |

(continued)

**Supplementary Table SII Continued**

| Gene name         | Gene description                                                       | Chromosome # | Fold change | P-value |
|-------------------|------------------------------------------------------------------------|--------------|-------------|---------|
| <i>NKAPL</i>      | NFKB activating protein like                                           | 6            | 4.849       | 0.009   |
| <i>MYCBPAP</i>    | MYCBP-associated protein                                               | 17           | 4.709       | 0.004   |
| <i>CTRC</i>       | Chymotrypsin C                                                         | 1            | 4.568       | 0.009   |
| <i>GNAL</i>       | G protein subunit alpha L                                              | 18           | 4.011       | 0.002   |
| <i>C5</i>         | Complement C5                                                          | 9            | 3.968       | 0.0003  |
| <i>ALDH1L2</i>    | Aldehyde dehydrogenase I family member L2                              | 12           | 3.953       | 0.005   |
| <i>TF</i>         | Transferrin                                                            | 3            | 3.942       | 0.002   |
| <i>ITGB4</i>      | Integrin subunit beta 4                                                | 17           | 3.816       | 0.002   |
| <i>MYO7A</i>      | Myosin VIIA                                                            | 11           | 3.692       | 0.004   |
| <i>PLEKHH3</i>    | Pleckstrin homology, MyTH4, and FERM domain containing H3              | 17           | 3.631       | 0.010   |
| <i>FAXDC2</i>     | Fatty acid hydroxylase domain containing 2                             | 5            | 3.568       | 0.001   |
| <i>MAGI2</i>      | Membrane-associated guanylate kinase, WW and PDZ domain containing 2   | 7            | 3.536       | 0.009   |
| <i>RND3</i>       | Rho family GTPase 3                                                    | 2            | 3.329       | 0.008   |
| <i>HIST1H2BB</i>  | Histone cluster 1 H2B family member b                                  | 6            | 3.287       | 0.002   |
| <i>HIST1H3F</i>   | Histone cluster 1 H3 family member f                                   | 6            | 3.047       | 0.009   |
| <i>ZC2HC1A</i>    | Zinc finger C2HC-type containing 1A                                    | 8            | 2.870       | 0.006   |
| <i>EPHB3</i>      | EPH receptor B3                                                        | 3            | 2.779       | 0.008   |
| <i>PRSS57</i>     | Serine protease 57                                                     | 19           | 2.700       | 0.003   |
| <i>HIST2H3C</i>   | Histone cluster 2 H3 family member c                                   | 1            | 2.684       | 0.002   |
| <i>KIF16B</i>     | Kinesin family member 16B                                              | 20           | 2.656       | 0.001   |
| <i>MAGI3</i>      | Membrane-associated guanylate kinase, WW, and PDZ domain containing 3  | 1            | 2.485       | 0.002   |
| <i>PRDM8</i>      | PR/SET domain 8                                                        | 4            | 2.427       | 0.002   |
| <i>NRIP3</i>      | Nuclear receptor interacting protein 3                                 | 11           | 2.359       | 0.009   |
| <i>NXN</i>        | Nucleoredoxin                                                          | 17           | 2.226       | 0.003   |
| <i>TRIM58</i>     | Tripartite motif containing 58                                         | 1            | 2.173       | 0.008   |
| <i>ATF3</i>       | Activating transcription factor 3                                      | 1            | 2.022       | 0.008   |
| <i>AL136295.1</i> | Novel protein                                                          | 14           | 1.952       | 0.000   |
| <i>CCDC150</i>    | Coiled-coil domain containing 150                                      | 2            | 1.947       | 0.001   |
| <i>IFI27L1</i>    | Interferon alpha inducible protein 27 like 1                           | 14           | 1.916       | 0.004   |
| <i>MT-ND1</i>     | Mitochondrially encoded NADH: ubiquinone oxidoreductase core subunit 1 | MT           | 1.735       | 0.002   |
| <i>AC040162.1</i> | Novel transcript                                                       | 16           | 1.687       | 0.002   |
| <i>ZNF850</i>     | Zinc finger protein 850                                                | 19           | 1.671       | 0.003   |
| <i>ERCC2</i>      | ERCC excision repair 2, TFIIH core complex helicase subunit            | 19           | 1.641       | 0.002   |
| <i>FAM72D</i>     | Family with sequence similarity 72 member D                            | 1            | 1.602       | 0.009   |
| <i>SGO1</i>       | Shugoshin 1                                                            | 3            | 1.553       | 0.007   |
| <i>CAST</i>       | Calpastatin                                                            | 5            | 1.549       | 0.003   |
| <i>ARHGAP19</i>   | Rho GTPase activating protein 19                                       | 10           | 1.548       | 0.010   |
| <i>ZNF432</i>     | Zinc finger protein 432                                                | 19           | 1.531       | 0.002   |
| <i>ZNF417</i>     | Zinc finger protein 417                                                | 19           | 1.468       | 0.010   |
| <i>LRIG2</i>      | Leucine rich repeats and immunoglobulin like domains 2                 | 1            | 0.667       | 0.010   |
| <i>RNASET2</i>    | Ribonuclease T2                                                        | 6            | 0.664       | 0.008   |
| <i>ZNF527</i>     | Zinc finger protein 527                                                | 19           | 0.618       | 0.005   |
| <i>ZNF714</i>     | Zinc finger protein 714                                                | 19           | 0.588       | 0.001   |
| <i>ZNF782</i>     | Zinc finger protein 782                                                | 9            | 0.576       | 0.007   |
| <i>LDLRAP1</i>    | Low-density lipoprotein receptor adaptor protein 1                     | 1            | 0.503       | 0.0003  |
| <i>CAPS</i>       | Calcyphosine                                                           | 19           | 0.490       | 0.007   |

(continued)

**Supplementary Table SII Continued**

| Gene name              | Gene description                                                     | Chromosome # | Fold change | P-value |
|------------------------|----------------------------------------------------------------------|--------------|-------------|---------|
| <i>ITGAV</i>           | Integrin subunit alpha V                                             | 2            | 0.482       | 0.002   |
| <i>FCHO2</i>           | FCH domain only 2                                                    | 5            | 0.449       | 0.003   |
| <i>IFITM3</i>          | Interferon-induced transmembrane protein 3                           | 11           | 0.431       | 0.0001  |
| <i>HIVEP2</i>          | Human immunodeficiency virus type I enhancer binding protein 2       | 6            | 0.419       | 0.001   |
| <i>ZFP90</i>           | ZFP90 zinc finger protein                                            | 16           | 0.408       | 0.001   |
| <i>FBP1</i>            | Fructose-bisphosphatase 1                                            | 9            | 0.400       | 0.007   |
| <i>CD274</i>           | CD274 molecule                                                       | 9            | 0.386       | 0.007   |
| <i>LDHD</i>            | Lactate dehydrogenase D                                              | 16           | 0.358       | 0.002   |
| <i>TRPM2</i>           | Transient receptor potential cation channel subfamily M member 2     | 21           | 0.351       | 0.004   |
| <i>DOCK7</i>           | Dedicator of cytokinesis 7                                           | 1            | 0.341       | 0.001   |
| <i>SEMA5B</i>          | Semaphorin 5B                                                        | 3            | 0.335       | 0.003   |
| <i>CDA</i>             | Cytidine deaminase                                                   | 1            | 0.323       | 0.001   |
| <i>SMAD9</i>           | SMAD family member 9                                                 | 13           | 0.319       | 0.003   |
| <i>DNAJC18</i>         | DnaJ heat shock protein family (Hsp40) member C18                    | 5            | 0.313       | 0.007   |
| <i>HLA-DPB1</i>        | Major histocompatibility complex, class II, DP beta 1                | 6            | 0.308       | 0.007   |
| <i>SIK1</i>            | Salt inducible kinase 1                                              | 21           | 0.288       | 0.002   |
| <i>CD24</i>            | CD24 molecule                                                        | 6            | 0.273       | 0.004   |
| <i>GABRP</i>           | Gamma-aminobutyric acid type A receptor pi subunit                   | 5            | 0.265       | 0.006   |
| <i>MT1E</i>            | Metallothionein 1E                                                   | 16           | 0.247       | 0.007   |
| <i>LIPT2</i>           | Lipoyl(octanoyl) transferase 2                                       | 11           | 0.229       | 0.002   |
| <i>BRINP1</i>          | BMP/retinoic acid inducible neural specific 1                        | 9            | 0.228       | 0.003   |
| <i>C2orf88</i>         | Chromosome 2 open reading frame 88                                   | 2            | 0.223       | 0.006   |
| <i>LIFR</i>            | LIF receptor alpha                                                   | 5            | 0.206       | 0.006   |
| <i>TMEM184A</i>        | Transmembrane protein 184A                                           | 7            | 0.169       | 0.009   |
| <i>RAMACL</i>          | RNA guanine-7 methyltransferase activating subunit like (pseudogene) | 6            | 0.160       | 0.003   |
| <i>SMIM5</i>           | Small integral membrane protein 5                                    | 17           | 0.159       | 0.001   |
| <i>PHYHIPL</i>         | Phytanoyl-CoA 2-hydroxylase interacting protein like                 | 10           | 0.145       | 0.005   |
| <i>UPK1B</i>           | Uroplakin 1B                                                         | 3            | 0.131       | 0.001   |
| <i>IL20RA</i>          | Interleukin 20 receptor subunit alpha                                | 6            | 0.114       | 0.008   |
| <i>KRT8</i>            | Keratin 8                                                            | 12           | 0.104       | 0.002   |
| <i>MYH14</i>           | Myosin heavy chain 14                                                | 19           | 0.093       | 0.008   |
| <i>MARC1</i>           | Mitochondrial amidoxime reducing component 1                         | 1            | 0.089       | 0.002   |
| <i>SYT5</i>            | Synaptotagmin 5                                                      | 19           | 0.082       | 0.002   |
| <i>LGR5</i>            | Leucine rich repeat containing G protein-coupled receptor 5          | 12           | 0.078       | 0.010   |
| <i>ALDH3B2</i>         | Aldehyde dehydrogenase 3 family member B2                            | 11           | 0.074       | 0.010   |
| <i>NTN4</i>            | Netrin 4                                                             | 12           | 0.074       | 0.009   |
| <i>CWH43</i>           | Cell wall biogenesis 43 C-terminal homolog                           | 4            | 0.067       | 0.002   |
| <i>FAM110C</i>         | Family with sequence similarity 110 member C                         | 2            | 0.066       | 0.001   |
| <i>CST1</i>            | Cystatin SN                                                          | 20           | 0.059       | 0.006   |
| <i>BICDL2</i>          | BICD family like cargo adaptor 2                                     | 16           | 0.042       | 0.007   |
| <i>SCGB1D2</i>         | Secretoglobin family 1D member 2                                     | 11           | 0.033       | 0.008   |
| <i>KRT80</i>           | Keratin 80                                                           | 12           | 0.033       | 0.008   |
| <i>ATP6V1G2-DDX39B</i> | ATP6V1G2-DDX39B readthrough (NMD candidate)                          | 6            | 0.032       | 0.004   |
| <i>VTCN1</i>           | V-set domain containing T-cell activation inhibitor 1                | 1            | 0.024       | 0.0002  |
| <i>AC008763.3</i>      | Novel protein                                                        | 19           | 0.003       | 0.009   |

Upregulation of 80 (fold change >1.0) and downregulation of 53 (fold change <0.1) protein-coding genes in stimulated prepregnancy uNK cells,  $P < 0.01$ .
